# Supplementary material for: Biological specificity of CDK4/6 inhibitors: dose response relationship, in vivo signaling, and composite response signature
Source: PubMed Central journal article supplement (PMC5546433; doi:10.18632/oncotarget.18435), 2017-06-10
Supplement: oncotarget-08-43678-s001.pdf [file oncotarget-08-43678-s001.pdf]

# Biological specificity of CDK4/6 inhibitors: dose response relationship, *in vivo* signaling, and composite response signature

## Supplementary Material

Genes where  $p < 0.1$  for MCF7 and T47D for both PD and LY (n = 599).

| PD                          | MCF7        |               | T47D        |               | MCF7/T47D Comparison    |                           |                     |
|-----------------------------|-------------|---------------|-------------|---------------|-------------------------|---------------------------|---------------------|
|                             | Upregulated | Downregulated | Upregulated | Downregulated | Upregulated Concordance | Downregulated Concordance | Overall Concordance |
| 221                         | 378         | 271           | 328         | 73.24%        | 80.56%                  | 87.31%                    |                     |
| 231                         | 368         | 238           | 361         | 90.65%        | 93.88%                  | 96.16%                    |                     |
| Concordance (PD/LY)         |             | 82.26%        | 88.86%      | 69.10%        | 76.21%                  |                           |                     |
| Overall Concordance (PD/LY) |             | 92.65%        |             | 84.47%        |                         |                           |                     |

LY downregulated

| GO biological process complete | GO Term    | Homo sapiens - REFUST (20972) | upload_1 (550) | upload_1 (expected) | upload_1 (over/under) | upload_1 (fold Enrichment) | upload_1 (P-value) |
|--------------------------------|------------|-------------------------------|----------------|---------------------|-----------------------|----------------------------|--------------------|
| cell cycle                     | GO:0007049 | 1337                          | 272            | 46.41               | +                     | 5.86                       | 1.47E-127          |
| cell cycle process             | GO:0022402 | 1091                          | 344            | 37.87               | +                     | 6.44                       | 4.19E-121          |
| mitotic cell cycle             | GO:0000278 | 794                           | 209            | 27.56               | +                     | 7.58                       | 1.45E-114          |
| mitotic cell cycle process     | GO:1903047 | 766                           | 205            | 26.99               | +                     | 7.71                       | 1.99E-113          |
| nuclear division               | GO:0000180 | 518                           | 150            | 17.98               | +                     | 8.34                       | 9.34E-85           |
| organelle fission              | GO:0048285 | 549                           | 151            | 19.06               | +                     | 7.92                       | 2.46E-82           |
| mitotic nuclear division       | GO:0007067 | 385                           | 126            | 13.36               | +                     | 9.43                       | 4.08E-76           |
| chromosome organization        | GO:0051276 | 1012                          | 186            | 35.13               | +                     | 5.29                       | 4.83E-75           |
| DNA metabolic process          | GO:0006259 | 781                           | 159            | 27.11               | +                     | 5.86                       | 7.85E-69           |
| cell division                  | GO:0051301 | 476                           | 128            | 16.52               | +                     | 7.75                       | 1.42E-67           |

LY upregulated

| GO biological process complete               | GO Term    | Homo sapiens - REFUST (20972) | upload_1 (550) | upload_1 (expected) | upload_1 (over/under) | upload_1 (fold Enrichment) | upload_1 (P-value) |
|----------------------------------------------|------------|-------------------------------|----------------|---------------------|-----------------------|----------------------------|--------------------|
| G-protein coupled receptor signaling pathway | GO:0007186 | 1193                          | 3              | 31.29               | -                     | < 0.2                      | 5.59E-07           |
| small molecule metabolic process             | GO:0044281 | 1768                          | 92             | 46.37               | +                     | 1.98                       | 2.22E-06           |
| organonitrogen compound metabolic process    | GO:1901564 | 1835                          | 91             | 48.12               | +                     | 1.89                       | 2.99E-05           |
| organic substance catabolic process          | GO:1901573 | 1594                          | 79             | 41.8                | +                     | 1.89                       | 3.92E-04           |
| catabolic process                            | GO:0009056 | 1896                          | 89             | 49.46               | +                     | 1.8                        | 4.44E-04           |
| single-organism metabolic process            | GO:0044710 | 3544                          | 142            | 92.94               | +                     | 1.53                       | 7.14E-04           |
| cellular catabolic process                   | GO:0044248 | 1581                          | 77             | 41.46               | +                     | 1.86                       | 1.19E-03           |
| organic acid metabolic process               | GO:0006082 | 956                           | 54             | 25.07               | +                     | 2.15                       | 1.34E-03           |
| oxoacid metabolic process                    | GO:0043436 | 939                           | 53             | 24.63               | +                     | 2.15                       | 1.80E-03           |
| monocarboxylic acid metabolic process        | GO:0032787 | 508                           | 35             | 13.32               | +                     | 2.63                       | 3.04E-03           |
| carboxylic acid metabolic process            | GO:0019752 | 832                           | 48             | 21.82               | +                     | 2.2                        | 3.77E-03           |

Supplementary Figure 1: Genes where  $p < 0.1$  for MCF7 and T47D for both PD and LY (n = 599).

Genes where p < 0.1 for MCF7 and T47D for both PD and LY (n = 599).

|               | MB468 Comparison           |                            |
|---------------|----------------------------|----------------------------|
|               | Overall Concordance w/MCF7 | Overall Concordance w/T47D |
| PD            | 54.59%                     | 49.25%                     |
| LY (250uM LY) | 53.92%                     | 53.09%                     |

| LY upregulated                     |            |                                |                |                     |                       |                            |                    |
|------------------------------------|------------|--------------------------------|----------------|---------------------|-----------------------|----------------------------|--------------------|
| GO biological process complete     | GO Term    | Homo sapiens - REFLIST (20972) | upload_1 (463) | upload_1 (expected) | upload_1 (over/under) | upload_1 (fold enrichment) | upload_1 (P-value) |
| mRNA processing                    | GO:0034470 | 392                            | 33             | 6.65                | +                     | 3.61                       | 9.80E-07           |
| mRNA metabolic process             | GO:0034660 | 546                            | 39             | 12.05               | +                     | 3.24                       | 2.07E-06           |
| metabolic process                  | GO:0008152 | 9790                           | 274            | 216.15              | +                     | 1.27                       | 3.77E-04           |
| ribosome biogenesis                | GO:0042254 | 517                            | 25             | 7                   | +                     | 3.57                       | 6.20E-04           |
| mRNA processing                    | GO:0008564 | 257                            | 22             | 5.67                | +                     | 3.66                       | 9.62E-04           |
| mRNA metabolic process             | GO:0018072 | 262                            | 23             | 6.23                | +                     | 3.69                       | 1.16E-05           |
| mRNA processing                    | GO:0008536 | 666                            | 46             | 19.16               | +                     | 2.55                       | 1.54E-05           |
| mitochondrial transport            | GO:0008539 | 229                            | 20             | 5.06                | +                     | 3.96                       | 2.65E-05           |
| cellular metabolic process         | GO:0044237 | 6323                           | 246            | 194.79              | +                     | 1.27                       | 3.46E-05           |
| single-organism metabolic process  | GO:0044710 | 3544                           | 119            | 76.24               | +                     | 1.52                       | 9.55E-05           |
| ribosomal large subunit biogenesis | GO:0042275 | 61                             | 10             | 1.55                | +                     | 7.45                       | 1.22E-02           |

| LY downregulated                                  |            |                                |                |                     |                       |                            |                    |
|---------------------------------------------------|------------|--------------------------------|----------------|---------------------|-----------------------|----------------------------|--------------------|
| GO biological process complete                    | GO Term    | Homo sapiens - REFLIST (20972) | upload_1 (739) | upload_1 (expected) | upload_1 (over/under) | upload_1 (fold enrichment) | upload_1 (P-value) |
| biological regulation                             | GO:0060007 | 11695                          | 506            | 412.05              | +                     | 1.23                       | 2.76E-09           |
| regulation of cellular process                    | GO:0050794 | 10446                          | 462            | 366.69              | +                     | 1.25                       | 2.77E-06           |
| regulation of biological process                  | GO:0050789 | 11075                          | 476            | 390.25              | +                     | 1.22                       | 3.57E-07           |
| positive regulation of cellular process           | GO:0046522 | 4774                           | 245            | 166.22              | +                     | 1.46                       | 6.04E-07           |
| negative regulation of biological process         | GO:0046519 | 4757                           | 241            | 166.92              | +                     | 1.44                       | 2.26E-06           |
| positive regulation of biological process         | GO:0046516 | 5321                           | 262            | 187.5               | +                     | 1.4                        | 6.40E-06           |
| negative regulation of cellular process           | GO:0046525 | 4261                           | 217            | 150.15              | +                     | 1.45                       | 2.74E-05           |
| biological process                                | GO:0008150 | 17240                          | 665            | 607.49              | +                     | 1.09                       | 6.91E-05           |
| regulation of metabolic process                   | GO:0019222 | 6360                           | 295            | 224.61              | +                     | 1.5                        | 5.06E-04           |
| regulation of cellular metabolic process          | GO:0051325 | 3360                           | 276            | 209.66              | +                     | 1.52                       | 6.76E-04           |
| regulation of macromolecular metabolic process    | GO:0060255 | 3910                           | 274            | 206.25              | +                     | 1.52                       | 6.26E-04           |
| positive regulation of cellular metabolic process | GO:0051326 | 2901                           | 164            | 102.22              | +                     | 1.51                       | 1.03E-05           |
| positive regulation of metabolic process          | GO:0008636 | 3096                           | 162            | 109.06              | +                     | 1.49                       | 1.06E-05           |

Supplementary Figure 2: Genes where p < 0.1 for MCF7 and T47D for both PD and LY (n = 599).

In vivo - p < 0.1 for both PD and LY (n = 2109)

|                             | In vivo     |               |
|-----------------------------|-------------|---------------|
|                             | Upregulated | Downregulated |
| PD                          | 914         | 1193          |
| LY                          | 916         | 1193          |
| Concordance (PD/LY)         | 93.86%      | 93.26%        |
| Overall Concordance (PD/LY) | 97.25%      |               |

| LY/PD downregulated                 |            |                                |                |                     |                       |                            |                    |
|-------------------------------------|------------|--------------------------------|----------------|---------------------|-----------------------|----------------------------|--------------------|
| GO biological process complete      | GO Term    | Homo sapiens - REFLIST (20972) | upload_1 (540) | upload_1 (expected) | upload_1 (over/under) | upload_1 (fold enrichment) | upload_1 (P-value) |
| cell cycle                          | GO:0007049 | 1337                           | 177            | 34.43               | +                     | 5.14                       | 8.07E-72           |
| mitotic cell cycle                  | GO:0000278 | 794                            | 137            | 20.44               | +                     | 6.7                        | 6.96E-67           |
| cell cycle process                  | GO:0022402 | 1091                           | 156            | 28.09               | +                     | 5.53                       | 2.25E-66           |
| mitotic cell cycle process          | GO:1903047 | 766                            | 134            | 19.72               | +                     | 6.79                       | 6.18E-66           |
| chromosome organization             | GO:0051276 | 1012                           | 129            | 26.06               | +                     | 4.95                       | 7.60E-48           |
| mitotic nuclear division            | GO:0007067 | 365                            | 64             | 9.91                | +                     | 8.47                       | 3.10E-46           |
| nuclear division                    | GO:0000180 | 518                            | 93             | 13.34               | +                     | 6.97                       | 1.07E-44           |
| organelle fission                   | GO:0048285 | 549                            | 65             | 14.14               | +                     | 6.72                       | 1.95E-44           |
| DNA metabolic process               | GO:0006259 | 781                            | 107            | 20.11               | +                     | 5.32                       | 2.15E-41           |
| chromosome segregation              | GO:0007039 | 295                            | 70             | 7.6                 | +                     | 9.22                       | 3.94E-40           |
| organelle organization              | GO:0006996 | 3186                           | 213            | 82.04               | +                     | 2.6                        | 1.48E-38           |
| cell division                       | GO:0051301 | 476                            | 82             | 12.26               | +                     | 6.69                       | 1.44E-37           |
| DNA replication                     | GO:0006260 | 217                            | 59             | 5.59                | +                     | 10.36                      | 1.97E-36           |
| nuclear chromosome segregation      | GO:008813  | 254                            | 62             | 6.54                | +                     | 9.48                       | 8.19E-36           |
| sister chromatid segregation        | GO:000819  | 163                            | 53             | 4.71                | +                     | 11.25                      | 9.98E-34           |
| cell cycle phase transition         | GO:0044770 | 268                            | 60             | 6.9                 | +                     | 8.69                       | 1.64E-32           |
| mitotic cell cycle phase transition | GO:0044772 | 262                            | 59             | 6.75                | +                     | 8.75                       | 4.76E-32           |

| LY/PD upregulated                            |            |                                |                |                     |                       |                            |                    |
|----------------------------------------------|------------|--------------------------------|----------------|---------------------|-----------------------|----------------------------|--------------------|
| GO biological process complete               | GO Term    | Homo sapiens - REFLIST (20972) | upload_1 (303) | upload_1 (expected) | upload_1 (over/under) | upload_1 (fold enrichment) | upload_1 (P-value) |
| single-organism cellular process             | GO:0044763 | 8816                           | 190            | 141.82              | +                     | 1.34                       | 1.57E-04           |
| single-organism metabolic process            | GO:0044710 | 3544                           | 89             | 51.2                | +                     | 1.74                       | 4.41E-04           |
| organophosphate biosynthetic process         | GO:0090407 | 466                            | 23             | 7.17                | +                     | 3.21                       | 1.08E-02           |
| carbohydrate derivative biosynthetic process | GO:1901137 | 256                            | 25             | 6.61                | +                     | 2.9                        | 2.17E-02           |
| basement membrane organization               | GO:0071711 | 15                             | 3              | 0.22                | +                     | 23.07                      | 2.65E-02           |
| lipid metabolic process                      | GO:0006629 | 1234                           | 39             | 17.83               | +                     | 2.19                       | 3.64E-02           |

Supplementary Figure 3: In vivo- p < 0.1 for both PD and LY (n = 2109).
